# Supplementary material for: [Hyp-Au-Sn9(Hyp)3-Au-Sn9(Hyp)3-Au-Hyp]−: the longest intermetalloid chain compound of tin
Source: Royal Society of Chemistry journal article supplement (doi:10.1039/c7cc07029b), 2017-01-01
Supplement: c7cc07029b1.pdf [file c7cc07029b1.pdf]

# Supporting Information

## **[[Hyp-Au-Sn<sub>9</sub>(Hyp)<sub>3</sub>-Au-Sn<sub>9</sub>(Hyp)<sub>3</sub>-Au-Hyp]<sup>-</sup>: The longest intermetalloid chain compound of tin**

Mareike Binder,<sup>a</sup> Claudio Schrenk,<sup>a</sup> Theresa Block,<sup>b</sup> Rainer Pöttgen<sup>b</sup> and Andreas Schnepf<sup>a\*</sup>

a) Institut für Anorganische Chemie, Universität Tübingen, Auf der Morgenstelle 18, D-72076 Tübingen, Germany.

b) Institut für Anorganische und Analytische Chemie, Universität Münster, Corrensstrasse 30, D-48149 Münster, Germany

## Experimental Section

All reactions were carried out under rigorous exclusion of air and moisture using Schlenk techniques under standard nitrogen atmosphere. All solvents were dried and purified by standard procedures. At  $-78^{\circ}\text{C}$   $\text{Ph}_3\text{PAuS}(\text{Hyp})$  (54 mg, 0.076 mmol) was dissolved in THF (ca. 20 mL) and transferred to precooled  $[\text{Li}(\text{tmeda})_2]_2\text{Sn}_{10}(\text{Hyp})_4$  (200 mg, 0.076 mmol). The dark green reaction mixture was slowly warmed up to RT while stirring, leading to a dark red solution. The solvent was removed in vacuum to give a black residue which was washed with pentane and extracted in toluene. The black toluene extract was stored at  $-30^{\circ}\text{C}$  for 7d leading to the formation of dark red crystals of  $[\text{Li}(\text{TMEDA})_2][\text{Au}_3\text{Sn}_{18}(\text{Hyp})_8]$ . (yield: 32 mg, 0.007 mmol, 11 %).  $^1\text{H-NMR}$  (250 MHz,  $\text{THF-d}_8$ ):  $\delta$  = 0.13 (s, 54 H,  $\text{AuSi}(\text{SiMe}_3)_3$ ), 0.25 (s,  $\text{Si}(\text{SiMe}_3)_4$ ), 0.41 (s, 162 H,  $\text{SnSi}(\text{SiMe}_3)_3$ ), 2.15 (s, TMEDA), 2.31 (s, TMEDA) ppm;  $^7\text{Li-NMR}$  (97.2 MHz,  $\text{THF-d}_8$ ): 0.41 (s,  $\text{Li}(\text{tmeda})_2^+$ ) ppm.

The obtained single crystals (dark red blocks) are very sensitive and rapidly lose solvent molecules and disintegrate into thin plates or rods. Hence, the single crystal quality decreases rapidly when taken out of the mother liquor into mineral oil for selection and preparation of the single crystals for x-ray measurements. Also NMR measurements to get an idea of the amount of embedded solvent molecules failed as the single crystals were washed and evaporated before dissolving in  $\text{THF-d}_8$  for NMR measurement. During this procedure the loosely bound solvent molecules within the crystal are completely removed so that no additional signals for the solvent molecules could be obtained within the proton NMR spectrum.

### ***<sup>119</sup>Sn Mössbauer spectroscopy***

A Ca<sup>119m</sup>SnO<sub>3</sub> source was used for the <sup>119</sup>Sn Mössbauer spectroscopic investigation. The sample was placed within a thin-walled glass container at a thickness of about 10 mg Sn/cm<sup>2</sup>. A palladium foil of 0.05 mm thickness was used to reduce the tin K X-rays concurrently emitted by this source. The measurement (11 d total counting time) was conducted in the usual transmission geometry at 78 K. Fitting of the spectrum was done with the NORMOS-90 software package.[1]

### ***Mass spectrometry***

The anionic cluster compound **2** was brought into the gas phase by electrospraying a thf solution of **2**. Mass spectrometer: Thermo Fischer Q Exactive Hybrid Quadrupol Orbitrap mass spectrometer.

### ***X-ray structural characterization***

Crystals were mounted on the diffractometer at 180 K. The data were collected on a Bruker APEX II diffractometer employing monochromated MoK $\alpha$  ( $\lambda$  = 0.71073 Å) radiation from a sealed tube and equipped with an Oxford Cryosystems cryostat. A semi-empirical absorption correction was applied using the program SADABS. The structure was solved by Direct Methods and refined against  $F^2$  for all observed reflections. Programs used: SHELXS and SHELXL[2] within the Olex2 program package.[3] CCDC-1551134 contains the supplementary crystallographic data for this paper. These data can be obtained free of charge from the Cambridge Crystallographic Data Centre via [www.ccdc.cam.ac.uk/data\\_request/cif](http://www.ccdc.cam.ac.uk/data_request/cif).

[Li(TMEDA)<sub>2</sub>][Au<sub>3</sub>Sn<sub>18</sub>(Hyp)<sub>8</sub>]: C<sub>84</sub>H<sub>248</sub>Au<sub>3</sub>Si<sub>32</sub>Sn<sub>18</sub>Li<sub>2</sub>N<sub>4</sub>; Mr = 4948.32 g mol<sup>-1</sup>, crystal dimensions 0.279 × 0.079 × 0.067 mm<sup>3</sup>, space group P-1, *a* = 14.9081(6) Å, *b* = 16.3138(7) Å, *c* = 24.6890(10) Å, *α* = 81.862(2)°, *β* = 87.078(2)°, *γ* = 63.232(2)°, *V* = 5306.6(4) Å<sup>3</sup>, *Z* = 1, *ρ*<sub>calc.</sub> = 1.47 g cm<sup>-3</sup>, *μ*<sub>Mo</sub> = 4.3 mm<sup>-1</sup>, 2 $\theta$ <sub>max</sub> = 52.97°, 109833 reflections measured, 21803 independent reflections (*R*<sub>int</sub> = 0.0986), absorptions correction: semi-empirical (min./max. transmission 0.556/0.746), *R*<sub>1</sub> (*I* > 2 $\sigma$ ) = 0.0707, *wR*<sub>2</sub> (all) = 0.2171, Bruker APEXII diffractometer (Mo<sup>Kα</sup> radiation (*λ* = 0.71073 Å), 180 K).

### ***Details on the refinement:***

During the structure solution large voids are present where the counter cation [Li(TMEDA)<sub>2</sub>]<sup>+</sup> and solvent molecules are located. However, during structure solution we were not able to refine the cation or solvent molecules due to disorder. Although, some residual electron density (Q-peaks) show the form of a six membered ring, refinement as toluene molecules failed. Nevertheless, treatment of the residual electron density using SQUEEZE<sup>[4]</sup> leads to voids of 1412 Å<sup>3</sup> with 609 electrons which fits to [Li(TMEDA)<sub>2</sub>]<sup>+</sup> together with 8 solvent (toluene) molecules.

The void has thereby the form of a peanut and one part of the peanut is centered at -0.121 0.5 0.5 and is thus not positioned at a special position (Figure S1 shows the void from different directions). As *Z* is equal 1 only one [Li(TMEDA)<sub>2</sub>]<sup>+</sup> is localized within this void and might reside in one side of the peanut while the other side is occupied by solvent molecules (toluene). As the space group is P-1, for the refinement we must solve the overlay of [Li(TMEDA)<sub>2</sub>]<sup>+</sup> and

many toluene molecules, where all atoms should have an occupancy of 50% (50% of a lithium cation is nearly a hydrogen atom). Additionally, as the inversion center is in the middle of the peanut, which might not fit with a tetrahedral  $[\text{Li}(\text{TMEDA})_2]^+$  a further disorder is expected for the cation. All these aspects together lead to a smearing of the electron density so that a refinement is not possible.

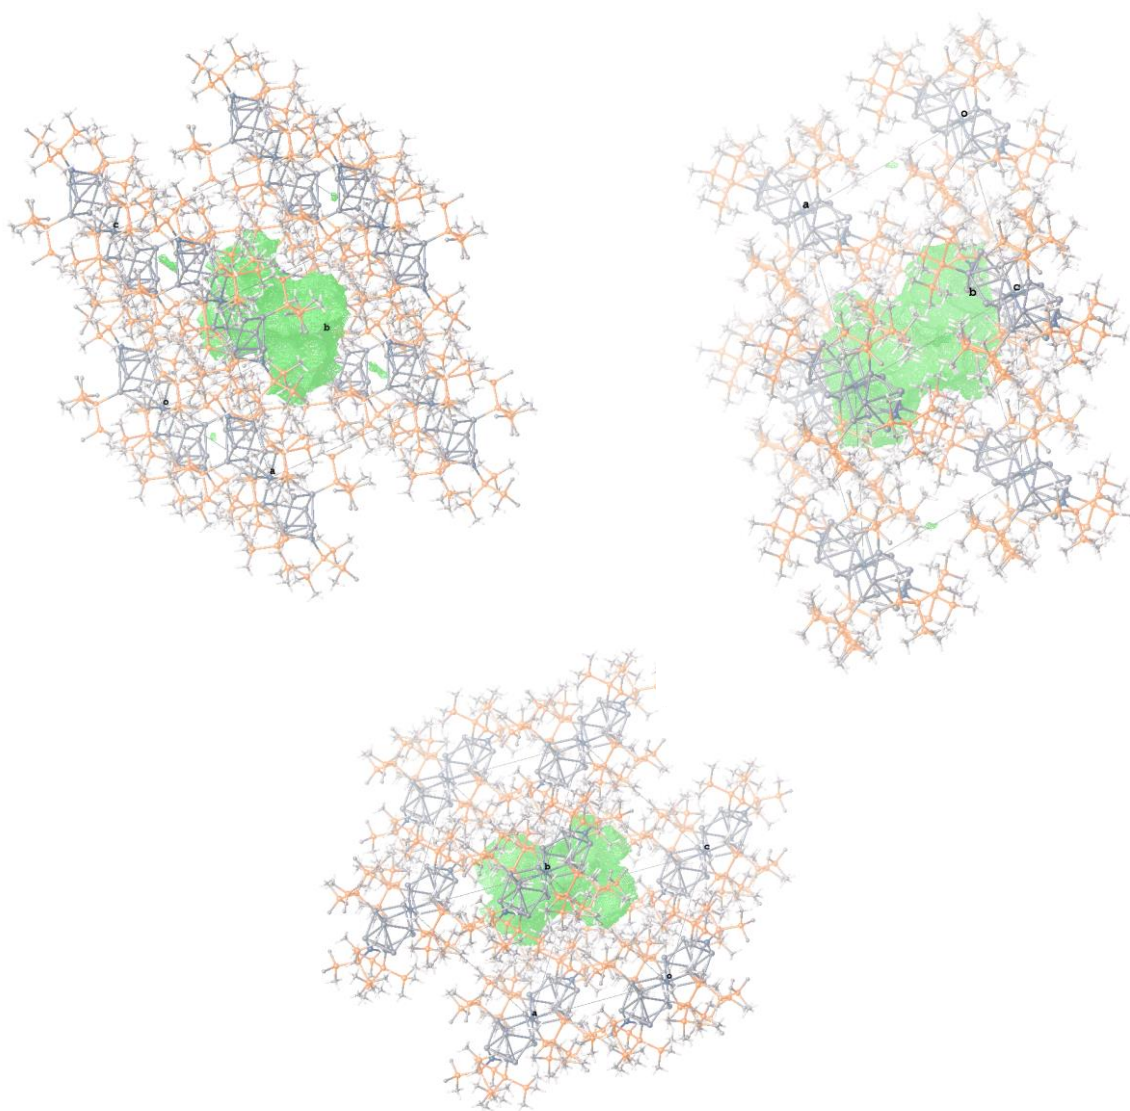

**Figure S1:** Picture of the void (green), localized at -0.121, 0.5, 0.5 within the solid state of  $[\text{Li}(\text{TMEDA})_2][\text{Au}_3\text{Sn}_{18}(\text{Hyp})_8]$  **1**; view from different directions.

## NMR spectroscopy:

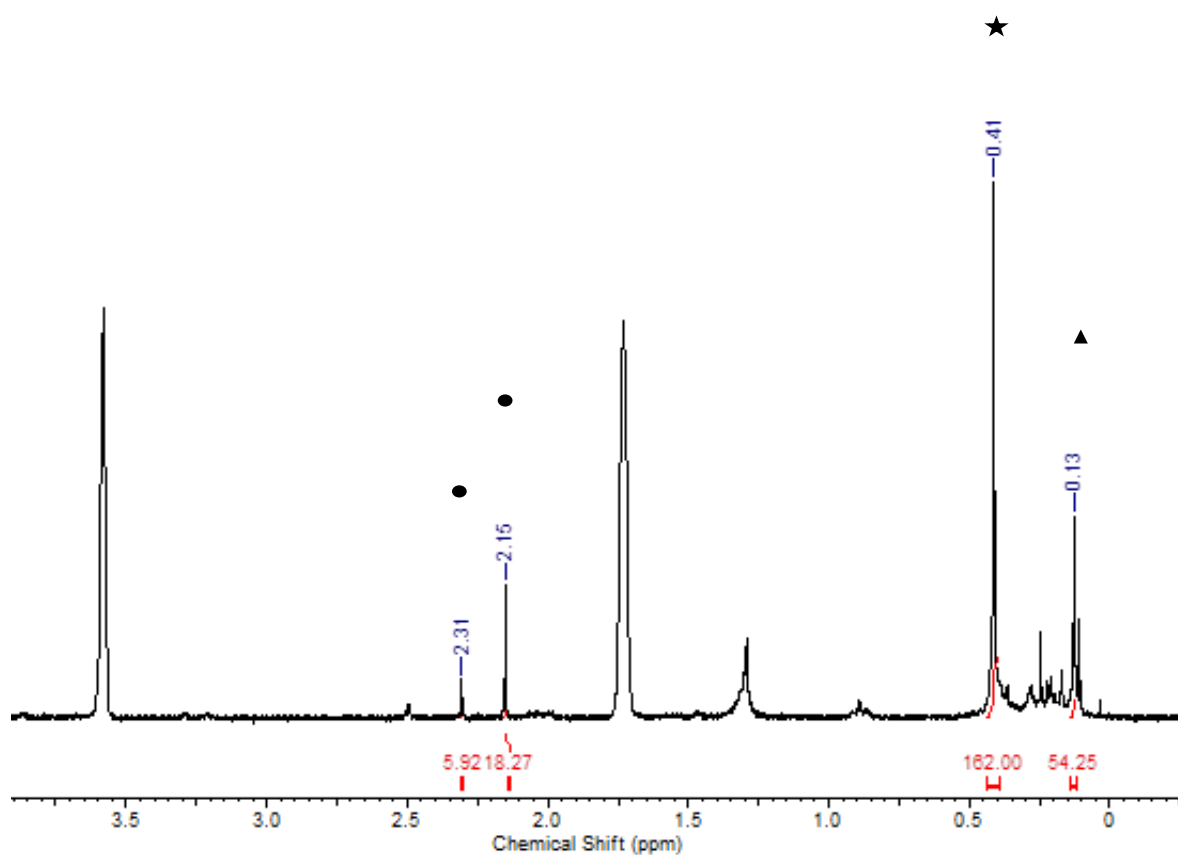

**Figure S2:**  $^1\text{H}$ -NMR of  $[\text{Li}(\text{TMEDA})_2][\text{Au}_3\text{Sn}_{18}(\text{Hyp})_8]$  **1** dissolved in  $\text{THF-}d_8$ . The signal at  $\delta = 0.13$  ppm shows the Hyp ligand bound to the gold atoms, whereas the signal at  $\delta = 0.41$  ppm could be assigned to the Hyp ligand bound to the tin atoms. The integrals show a ratio of cluster to TMEDA of 1:1.5. ( ● TMEDA, ★ SnHyp, ▲ AuHyp).

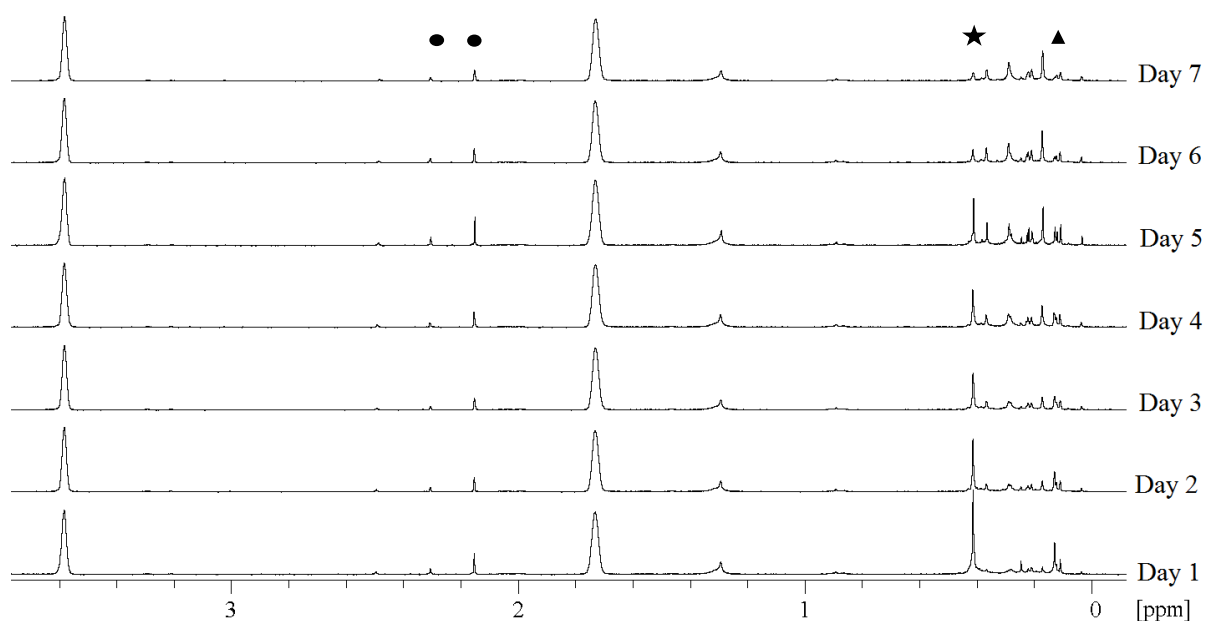

**Figure S3:**  $^1\text{H}$ -NMR of  $[\text{Li}(\text{TMEDA})_2][\text{Au}_3\text{Sn}_{18}(\text{Hyp})_8]$  **1** dissolved in  $\text{THF-d}_8$  shows a fast degradation of **1** within 7 days. The TMEDA signals at  $\delta = 2.15$  ppm and  $\delta = 2.13$  ppm doesn't change during that period, whereas the two Hyp signals at  $\delta = 0.13$  ppm and  $\delta = 0.41$  ppm nearly disappears at day 7.

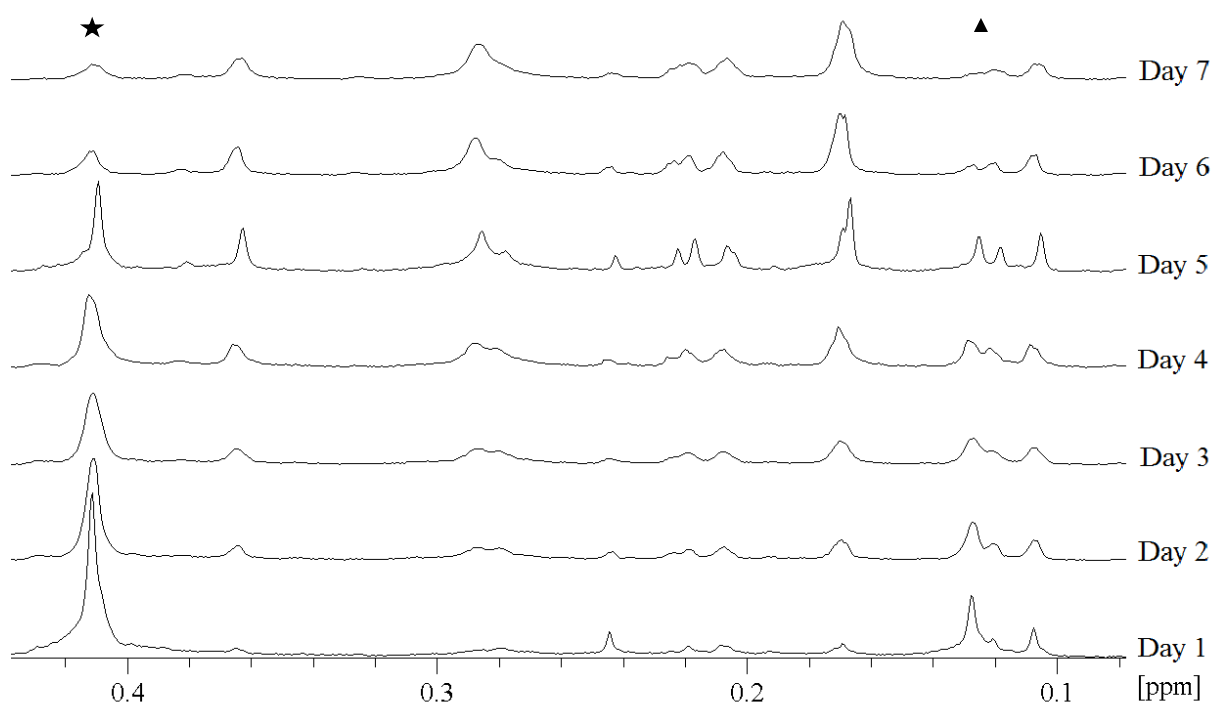

**Figure S4:** Enlargement of the  $^1\text{H}$ -NMR spectra of  $[\text{Li}(\text{TMEDA})_2][\text{Au}_3\text{Sn}_{18}(\text{Hyp})_8]$  **1**. The Hyp ligand signals at  $\delta = 0.13$  ppm and  $\delta = 0.41$  ppm show a fast degradation of **1** within the first two days. After 7 days the signals are nearly vanished and the spectrum gets more and more complex.

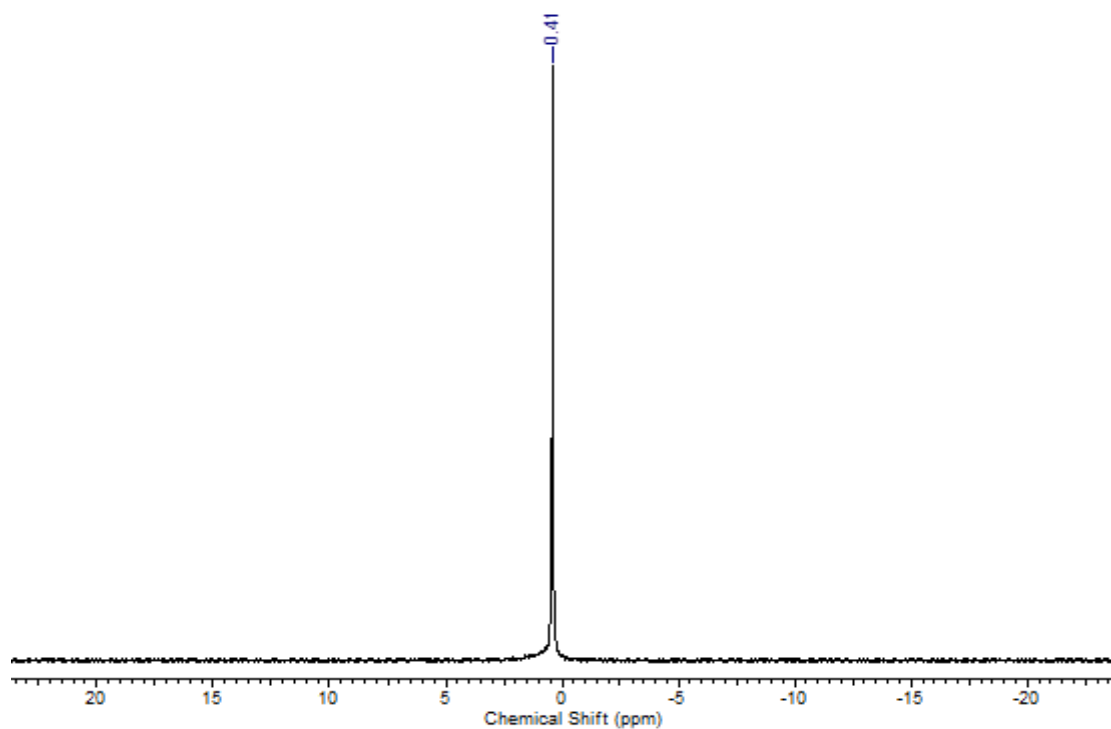

**Figure S5:**  $^7\text{Li}$ -NMR of  $[\text{Li}(\text{TMEDA})_2][\text{Au}_3\text{Sn}_{18}(\text{Hyp})_8]$  **1** dissolved in  $\text{THF-d}_8$  shows a singlet at  $\delta = 0.41$  ppm, which can be seen as prove for the presence of  $[\text{Li}(\text{TMEDA})_2]^+$  in the crystals.

## Mass spectrometry:

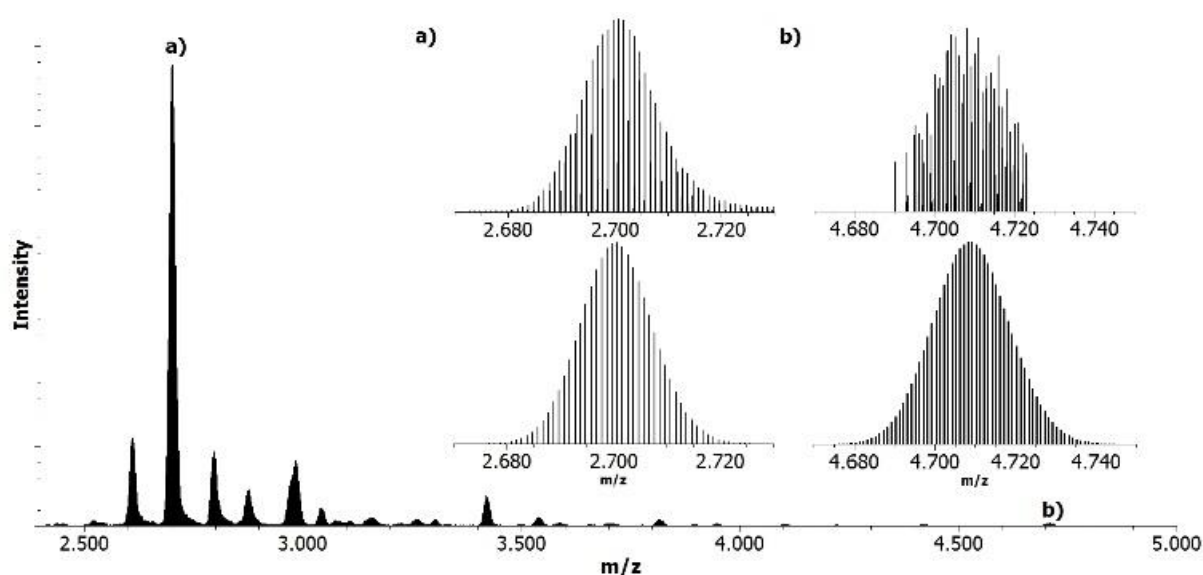

**Figure S6:** Mass spectrum of a solution of  $[\text{Au}_3\text{Sn}_{18}(\text{Hyp})_8]^-$  **1** in THF after electrospray ionization (ESI). Inset measured and calculated isotopic pattern for a)  $[\text{Au}_3\text{Sn}_{18}(\text{Hyp})_8]^-$  **1** and b)  $[\text{Au}_2\text{Sn}_9(\text{Hyp})_5]^-$

The sensitivity of **1** in solution is also obvious from mass spectrometric investigations on dissolved crystals of **1**. Hence, electrospraying a thf solution of dissolved crystals gives a complicated mass spectrum (figure S6) where the signal of **1** is barely observable (figure S6 inset). While transferring the dissolved crystals to the mass spectrometer you can see a color change from dark purple to a brownish color, which indicates the fast decomposition of  $[\text{Au}_3\text{Sn}_{18}(\text{Hyp})_8]^-$  in thf and also explains the barely visible molecular peak. However, besides the signal of **1** the decomposition product with the highest intensity (signal at  $m/z = 2699$ ) could be identified as  $[\text{Au}_2\text{Sn}_9(\text{Hyp})_5]^-$  by its mass and isotopic pattern (figure S6 inset) and which might form from **1** by the elimination of the neutral group  $\text{AuSn}_9\text{Hyp}_3$ . The NMR and mass spectrometric investigations thus show that **1** is quite unstable in solution and decomposes into smaller fragments.

## Quantum chemical calculations:<sup>5</sup>

The model compound  $[\text{Au}_3\text{Sn}_{18}(\text{SiH}_3)_8]^-$  **1a** was calculated with additional  $C_3$  symmetry to get a good and comparable structural arrangement.

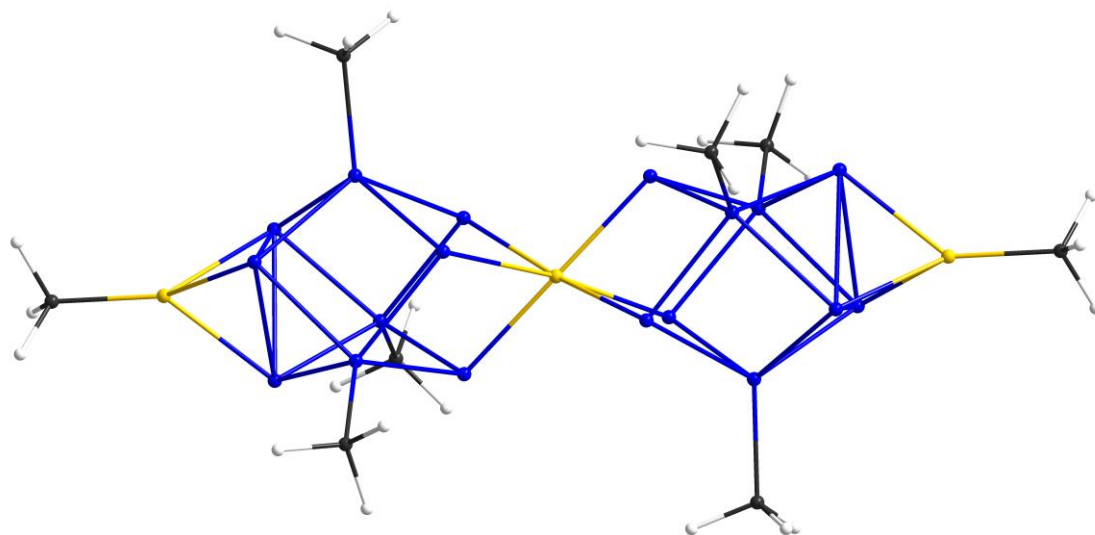

**Figure S7:** Optimized structure of **1a** with constrained  $C_3$  symmetry.

Total energy: -2799.97123443018

HOMO-LUMO-gap: 0.962 eV

### Coordinates of **1a**:

|                                   |                                   |
|-----------------------------------|-----------------------------------|
| Au1 -0.000000 0.000000 -0.033634  | Si15 0.459488 -5.000398 -4.097402 |
| Sn2 1.836398 -0.853312 -2.164582  | Si16 -4.560215 2.102271 -4.097402 |
| Sn3 -1.657189 -1.163712 -2.164582 | Si17 4.100728 2.898127 -4.097402  |
| Sn4 -0.179210 2.017023 -2.164582  | Sn18 0.235385 2.389026 4.104019   |
| Sn5 0.211863 -2.389683 -4.164329  | Sn19 -2.186650 -0.990664 4.104019 |
| Sn6 -2.175457 1.011363 -4.164329  | Sn20 -1.592144 1.140465 6.166454  |
| Sn7 1.963594 1.378320 -4.164329   | Sn21 1.783744 0.808604 6.166454   |
| Sn8 1.774836 -0.824811 -6.233140  | Si22 0.518295 4.997561 4.146674   |
| Sn9 -1.601725 -1.124648 -6.233140 | Sn23 -0.191600 -1.949070 6.166454 |
| Sn10 -0.173111 1.949458 -6.233140 | Si24 -4.587162 -2.049924 4.146674 |
| Au11 0.000000 -0.000000 -8.468265 | Sn25 1.951265 -1.398362 4.104019  |
| Sn12 -1.644320 1.177787 2.099489  | Au26 0.000000 0.000000 8.401301   |
| Sn13 1.842153 0.835129 2.099489   | Si27 4.068867 -2.947637 4.146674  |
| Sn14 -0.197834 -2.012916 2.099489 | Si28 -0.000000 0.000000 10.814252 |

H29 0.371852 1.340374 11.425311  
 H30 -1.346724 -0.348154 11.425311  
 H31 0.974872 -0.992221 11.425311  
 Si32 0.000000 -0.000000 -10.881816  
 H33 -0.470007 -1.309166 -11.492930  
 H34 1.368774 0.247545 -11.492930  
 H35 -0.898767 1.061621 -11.492930  
 H36 1.931227 5.425346 3.822096  
 H37 -0.394680 5.679516 3.153183  
 H38 0.185955 5.547385 5.514965  
 H39 5.306380 2.216217 -4.703238  
 H40 3.897186 4.193652 -4.849110  
 H41 4.453464 3.254145 -2.671405

H42 -5.664101 -1.040181 3.822096  
 H43 3.732874 -4.385165 3.822096  
 H44 -4.721265 -3.181561 3.153183  
 H45 5.115946 -2.497955 3.153183  
 H46 -4.897153 -2.612651 5.514965  
 H47 4.711199 -2.934734 5.514965  
 H48 -4.572490 3.487352 -4.703238  
 H49 -0.733890 -5.703568 -4.703238  
 H50 -5.580402 1.278236 -4.849110  
 H51 1.683216 -5.471888 -4.849110  
 H52 -5.044904 2.229740 -2.671405  
 H53 0.591441 -5.483885 -2.671405

## Ahlrichs-Heinzmann population analysis:<sup>6</sup>

### Two-center-SEN:<sup>7</sup>

|                                     |                 |         |
|-------------------------------------|-----------------|---------|
| shared electron number for the pair | 1 au - 2 sn =   | 0.3278  |
| shared electron number for the pair | 1 au - 12 sn =  | 0.3242  |
| shared electron number for the pair | 2 sn - 3 sn =   | 0.5544  |
| shared electron number for the pair | 2 sn - 5 sn =   | 0.9445  |
| shared electron number for the pair | 2 sn - 7 sn =   | 0.9516  |
| shared electron number for the pair | 2 sn - 8 sn =   | 0.1377  |
| shared electron number for the pair | 2 sn - 9 sn =   | -0.0141 |
| shared electron number for the pair | 2 sn - 10 sn =  | -0.0151 |
| shared electron number for the pair | 2 sn - 13 sn =  | 0.0209  |
| shared electron number for the pair | 5 sn - 8 sn =   | 0.9057  |
| shared electron number for the pair | 5 sn - 9 sn =   | 0.9053  |
| shared electron number for the pair | 5 sn - 15 si =  | 1.2067  |
| shared electron number for the pair | 8 sn - 9 sn =   | 0.6830  |
| shared electron number for the pair | 8 sn - 11 au =  | 0.2236  |
| shared electron number for the pair | 11 au - 32 si = | 0.7916  |
| shared electron number for the pair | 12 sn - 13 sn = | 0.5587  |
| shared electron number for the pair | 12 sn - 18 sn = | 0.9406  |
| shared electron number for the pair | 12 sn - 19 sn = | 0.9371  |
| shared electron number for the pair | 12 sn - 20 sn = | 0.1378  |
| shared electron number for the pair | 12 sn - 21 sn = | -0.0149 |
| shared electron number for the pair | 12 sn - 23 sn = | -0.0139 |
| shared electron number for the pair | 15 si - 49 h =  | 1.3119  |
| shared electron number for the pair | 15 si - 51 h =  | 1.3133  |
| shared electron number for the pair | 15 si - 53 h =  | 1.3211  |
| shared electron number for the pair | 18 sn - 20 sn = | 0.9138  |
| shared electron number for the pair | 18 sn - 21 sn = | 0.9172  |
| shared electron number for the pair | 18 sn - 22 si = | 1.2077  |

|                                     |                 |        |
|-------------------------------------|-----------------|--------|
| shared electron number for the pair | 20 sn - 21 sn = | 0.6790 |
| shared electron number for the pair | 20 sn - 26 au = | 0.2228 |
| shared electron number for the pair | 22 si - 36 h =  | 1.3119 |
| shared electron number for the pair | 22 si - 37 h =  | 1.3152 |
| shared electron number for the pair | 22 si - 38 h =  | 1.3199 |
| shared electron number for the pair | 26 au - 28 si = | 0.7931 |
| shared electron number for the pair | 28 si - 29 h =  | 1.3173 |
| shared electron number for the pair | 32 si - 33 h =  | 1.3174 |

### Three- and Four-center-SEN:

|                 |         |                  |         |
|-----------------|---------|------------------|---------|
| n( 1 2 3) =     | 0.1035  | n( 5 9 11) =     | -0.0193 |
| n( 1 2 3 4)=    | 0.0567  | n( 5 15 49) =    | -0.0192 |
| n( 1 2 3 5)=    | -0.0166 | n( 5 15 51) =    | -0.0189 |
| n( 1 2 3 12)=   | -0.0247 | n( 5 15 53) =    | -0.0168 |
| n( 1 2 3 13)=   | -0.0222 | n( 8 9 10) =     | 0.2046  |
| n( 1 2 5) =     | -0.0234 | n( 8 9 10 11)=   | 0.0335  |
| n( 1 2 7) =     | -0.0236 | n( 8 9 11) =     | 0.0608  |
| n( 1 2 8) =     | -0.0117 | n( 8 9 11 32)=   | -0.0659 |
| n( 1 2 12) =    | -0.1302 | n( 8 11 32) =    | -0.1840 |
| n( 1 2 12 13)=  | -0.0222 | n( 11 32 33) =   | -0.0215 |
| n( 1 2 12 14)=  | -0.0249 | n( 12 13 14) =   | 0.1543  |
| n( 1 2 13) =    | -0.0210 | n( 12 13 18) =   | 0.1729  |
| n( 1 2 14) =    | -0.0412 | n( 12 13 19) =   | -0.0179 |
| n( 1 12 13) =   | 0.1020  | n( 12 13 25) =   | -0.0183 |
| n( 1 12 13 14)= | 0.0561  | n( 12 18 19 20)= | 0.0332  |
| n( 1 12 13 18)= | -0.0168 | n( 12 18 20) =   | 0.0757  |
| n( 1 12 18) =   | -0.0234 | n( 12 18 21) =   | -0.0346 |
| n( 1 12 19) =   | -0.0232 | n( 12 19 20) =   | 0.0752  |
| n( 1 12 20) =   | -0.0118 | n( 12 19 23) =   | -0.0350 |
| n( 2 3 4) =     | 0.1523  | n( 12 20 26) =   | -0.0110 |
| n( 2 3 5) =     | 0.1753  | n( 18 20 21) =   | 0.1954  |
| n( 2 3 6) =     | -0.0171 | n( 18 20 23) =   | -0.0218 |
| n( 2 3 7) =     | -0.0174 | n( 18 20 26) =   | -0.0197 |
| n( 2 5 7 8)=    | 0.0327  | n( 18 21 23) =   | -0.0218 |
| n( 2 5 8) =     | 0.0751  | n( 18 21 26) =   | -0.0197 |
| n( 2 5 9) =     | -0.0343 | n( 18 22 36) =   | -0.0193 |
| n( 2 7 8) =     | 0.0753  | n( 18 22 37) =   | -0.0179 |
| n( 2 7 10) =    | -0.0343 | n( 18 22 38) =   | -0.0174 |
| n( 2 8 11) =    | -0.0111 | n( 20 21 23) =   | 0.2035  |
| n( 5 8 9) =     | 0.1924  | n( 20 21 23 26)= | 0.0335  |
| n( 5 8 9 10)=   | -0.0114 | n( 20 21 26) =   | 0.0606  |
| n( 5 8 10) =    | -0.0230 | n( 20 21 26 28)= | -0.0654 |
| n( 5 8 11) =    | -0.0195 | n( 20 26 28) =   | -0.1832 |
| n( 5 9 10) =    | -0.0229 | n( 26 28 29) =   | -0.0215 |

Atomic charges:

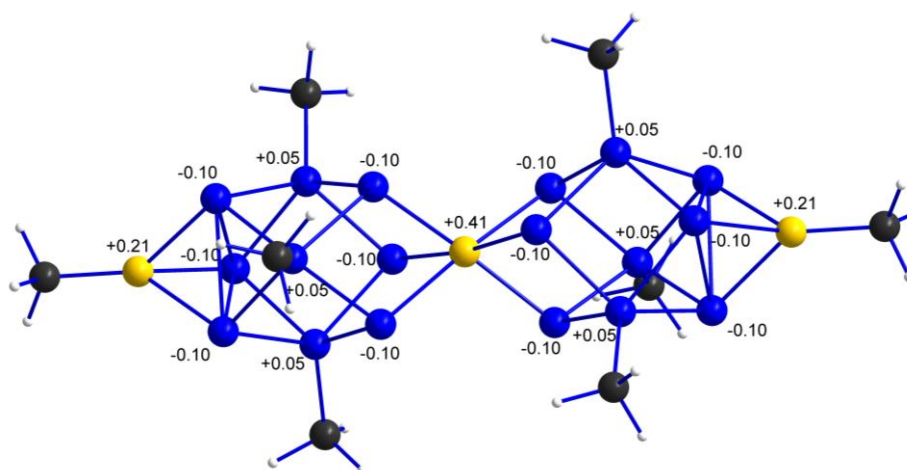

**Figure S8:** Atomic charges of the Sn and Au atoms in **1a**

| ----- |         |       |         |
|-------|---------|-------|---------|
| atom  | charge  |       |         |
| ----- |         |       |         |
| 1 au  | 0.4182  | 27 si | 0.0185  |
| 2 sn  | -0.1018 | 28 si | -0.0981 |
| 3 sn  | -0.1018 | 29 h  | -0.0564 |
| 4 sn  | -0.1018 | 30 h  | -0.0564 |
| 5 sn  | 0.0551  | 31 h  | -0.0564 |
| 6 sn  | 0.0551  | 32 si | -0.0979 |
| 7 sn  | 0.0551  | 33 h  | -0.0561 |
| 8 sn  | -0.1012 | 34 h  | -0.0561 |
| 9 sn  | -0.1012 | 35 h  | -0.0561 |
| 10 sn | -0.1012 | 36 h  | -0.0313 |
| 11 au | 0.2060  | 37 h  | -0.0279 |
| 12 sn | -0.1003 | 38 h  | -0.0269 |
| 13 sn | -0.1003 | 39 h  | -0.0309 |
| 14 sn | -0.1003 | 40 h  | -0.0307 |
| 15 si | 0.0183  | 41 h  | -0.0250 |
| 16 si | 0.0183  | 42 h  | -0.0313 |
| 17 si | 0.0183  | 43 h  | -0.0313 |
| 18 sn | 0.0509  | 44 h  | -0.0279 |
| 19 sn | 0.0509  | 45 h  | -0.0279 |
| 20 sn | -0.0994 | 46 h  | -0.0269 |
| 21 sn | -0.0994 | 47 h  | -0.0269 |
| 22 si | 0.0185  | 48 h  | -0.0309 |
| 23 sn | -0.0994 | 49 h  | -0.0309 |
| 24 si | 0.0185  | 50 h  | -0.0307 |
| 25 sn | 0.0509  | 51 h  | -0.0307 |
| 26 au | 0.2066  | 52 h  | -0.0250 |
|       |         | 53 h  | -0.0250 |
|       |         | ----- |         |

## References:

---

- <sup>[1]</sup> R. A. Brand, *Normos Mössbauer Fitting Program, University of Duisburg, Duisburg (Germany)* **2002**.
- <sup>[2]</sup> a) G. M. Sheldrick, *Acta Crystallogr.* **2008**, *A64*, 112 – 122; b) G. M. Sheldrick, *Acta Crystallogr.* **2015**, *C71*, 3 – 8.
- <sup>[3]</sup> O. V. Dolomanov, L. J. Bourhis, R. J. Gildea, J. A. K. Howard, H. Puschmann, *J. Appl. Crystallogr.* **2009**, *42*, 339 – 341.
- <sup>[4]</sup> A. L. Spek, *J. Appl. Crystallogr.* **2003**, *36*, 7 – 13.
- <sup>[5]</sup> Turbomole: O. Treutler, R. Ahlrichs, *J. Chem. Phys.* **1995**, *102*, 346 – 354; BP86 functional: J. P. Perdew, *Phys. Rev. B* **1986**, *33*, 8822 – 88824; A. D. Becke, *Phys. Rev. A* **1988**, *38*, 3098 – 3100; RI-DFT: K. Eichkorn, O. Treutler, H. Öhm, M. Häser, R. Ahlrichs, *Chem. Phys. Lett.* **1995**, *240*, 283 – 290; SVP: A. Schäfer, H. Horn, R. Ahlrichs, *J. Chem. Phys.* **1992**, *97*, 2751 – 2577; TmoleX client: C. Steffen, K. Thomas, U. Huniar, A. Hellweg, O. Rubner, A. Schroer, *J. Comput. Chem.* **2010**, *31*, 2967 – 2970.
- <sup>[6]</sup> E. R. Davidson, *J. Chem. Phys.*, 1967, **46**, 3320–3324; K. R. Roby, *Mol. Phys.*, 1974, **27**, 81–104; R. Heinzmann, R. Ahlrichs, *Theor. Chim. Acta*, 1976, **42**, 33–45; C. Erhardt, R. Ahlrichs, *Theor. Chim. Acta*, 1985, **68**, 231–245.
- <sup>[7]</sup> Shared electron numbers (SENs) for bonds are a reliable measure of the strength of covalent bonding. For example, the SEN for the Sn–Sn single bond in the model compound Me<sub>3</sub>SnSnMe<sub>3</sub> is 1.07.
